# Supplementary material
Source: publisher site journal article supplement (https://www.dovepress.com/article/293099)
Supplement: Supplementary file 1 [file get_supplementary_file.php]

Supplementals

Table 1: Variable list ARTIC COPD prediction project

| **Variables** | **Time windows** |
| --- | --- |
|  | For all time windows, the same time windows were created for the year before, in order to capture time dependency |
| **Number of contacts to primary care**  Contacts to primary care has two levels – Who was the contact with and what type of contact was it:  **Who**   - Physician - Nurse - Other (secretary, physiotherapist, dietician etc.)   **Type**   - Physical visit - Phone - Laboratory - Administrative - Other (Many of these were just logged as ‘activity’ in the system) | 1– 10 days before  + Same period the year before |
| 1 – 30 days before  + Same period the year before |
| 1 – 60 days before  + Same period the year before |
| 1 – 90 days before  + Same period the year before |
| 1 – 180 days before + Same period the year before |
| 1 – 365 days before + Same period the year before |
| 1 – all days before (standardised for number of days)  + Same period the year before |
| **Number of contacts to secondary care**  For the contacts to secondary care we have information on whether the contact was inpatient (patient staying overnight in the hospital or outpatient (patient NOT staying overnight in the hospital.  For inpatient stays we also have information on length of stay.  (We do not know who the patient saw during these visits) | 1– 10 days before |
| 1 – 30 days before |
| 1 – 60 days before |
| 1 – 90 days before |
| 1 – 180 days before |
| 1 – 365 days before |
| 1 – all days before (standardised for number of days) |
| **Number of exacerbations**  Creation of the variable exacerbation is based on diagnosis from primary and secondary care and medications  Severe exacerbation – COPD-related hospitalizations (J44 in primary position or J44.0/J44.1 in secondary) or emergency visits (J44.0/J44.1 in out-patient hospital care).  Moderate exacerbation: Exacerbation where treatment with systemic corticosteroids (H02AB) or antibiotics (J01AA, J01CA) or both was required (but no hospitalization)  Exacerbations occurring within 10 days (i.e., the prediction window) will be considered as one event. | 1– 10 days before |
| 1 – 30 days before |
| 1 – 60 days before |
| 1 – 90 days before |
| 1 – 180 days before |
| 1 – 365 days before |
| 1 – all days before (standardised for number of days) |
| **Number of comorbidities**  Information about comorbidities comes from data from primary care, inpatient and outpatient registration. In hospital settings (inpatient and outpatient) diagnosis are entered as one main diagnosis and several sub-diagnoses for each visit. For comorbidity analysis we did not distinguish between main and sub-diagnosis.  Comorbidities were divided into main groups and sub-groups (See table 2).  Diagnoses not in the groups are referred to as “other diagnosis”  Charlson comorbidity index (CCI) is calculated by year, using all diagnoses in primary and secondary care for a given year. CCI in the previous year is used for predictions. | 1– 10 days before |
| 1 – 30 days before |
| 1 – 60 days before |
| 1 – 90 days before |
| 1 – 180 days before |
| 1 – 365 days before |
| 1 – all days before (standardised for number of days) |
| **Number of medications**  Information about medication comes from two sources. Before 2005 there was no national prescription registry and we, therefore, use data from EMR entries for this period (prescribed medications). After July 2005 we use data from the national prescription registry (Filled prescriptions). An entry of medication means that a prescription was prescribed (before 2005) or filled (after 2005).  Medications were divided into main-groups and sub-groups (See table 3). Medications not in the groups are referred to as “other medications” | 1– 10 days before |
| 1 – 30 days before |
| 1 – 60 days before |
| 1 – 90 days before |
| 1 – 180 days before |
| 1 – 365 days before |
| 1 – all days before (standardised for number of days) |
| **Value of measurements**  Measurements covers lab tests and measurements from primary care.  BMI  Weight  Height  C-reactive protein  Hemoglobin  High density lipoprotein (HDL)  low density lipoprotein (LDL)  LDL/HDL  HbA1C  Leucocytes  Total Cholesterol  TriGlycerides  Forced vital capacity (FVC) (before and after bronchodilation)  First second of forced expiration (FEV1) (before and after bronchodilation)  FEV1/FVC (before and after bronchodilation)  Lab tests and measurements are not taken often, and, in many cases, values are imputed using mean values. There is little variation in the values making them poor predictors. | Latest value |
| **Patient information**  Age  Gender  Place of first COPD diagnosis (inpatient care, outpatient care, primary care) | Same throughout study |
| **Yearly value of social variables**  Education Level of education, 1-7   - 1, Primary School for < 9 years - 2, Primary School for 9 years - 3, High School Education, only 2 years - 4, High School Education, normally 12 years - 5, Post High School Education, < 3 years - 6, Post High School Education, 3 years or more - 7, Research education - Information is missing   Income level (Income from work 100 SEK per year)  Smoking (Smoker, non-smoker, former smoker)  Number of hours receiving sick leave benefits per year*100  Receiving sick leave benefit, yes/no  Number of days per year receiving sick leave benefit, brutto  Number of days per year receiving sick leave benefit, netto  Income from social security, yes/no  Employment status (no, yes, working, not working, completely not working)  Early retirement pension, number of gross months  Early retirement pension, number of net months | Value from year before prediction point was used |
| **Seasonal variables**  year  month  week  day of the week |  |

Table 2: Comorbidities

| Comorbidity | | ICD10 code |
| --- | --- | --- |
| Asthma |  | J45 |
| Cardiovascular Disease | | I00-I99 |
|  | Acute rheumatic fever | I00-I02 |
|  | Chronic rheumatic heart diseases | I05-I09 |
|  | Hypertensive diseases | I10-I15 |
|  | Ischemic heart diseases | I20-I25 |
|  | Pulmonary heart disease and diseases of pulmonary circulation | I26-I28 |
|  | Atrial fibrillation | I48 |
|  | Heart failure | I50 |
|  | Other forms of heart disease | I30-I47, I49, I51-I52 |
|  | Cerebrovascular diseases | I60-I69 |
|  | Diseases of arteries, arterioles and capillaries | I70-I79 |
|  | Diseases of veins, lymphatic vessels and lymph nodes, not elsewhere classified | I80-I89 |
|  | Other and unspecified disorders of the circulatory system | I95-I99 |
| Diabetes | |  |
|  | Diabetes type I | E10 |
|  | Diabetes type II | E11, E13 |
| Hyperlipidaemia | |  |
|  | Hyperlipidaemia | E78.5 |
| Depression | |  |
|  | Major depressive disorder, single episode | F32 |
|  | Major depressive disorder, recurrent | F33 |
| Anxiety | |  |
|  | Phobic anxiety disorders | F40 |
|  | Other anxiety disorders | F41 |
| Gastro-Esophageal Reflux Disease (GERD) | | K21 |
|  | GERD with esophagitis | K21.0 |
|  | GERD without esophagitis | K21.9 |
| Chronic pain | | G89.2, G89.4 |
|  | Chronic pain, not elsewhere classified | G89.2 |
|  | Chronic pain due to trauma | G89.21 |
|  | Chronic post-thoracotomy pain | G89.22 |
|  | Other chronic postprocedural pain | G89.28 |
|  | Other chronic pain | G89.29 |
|  | Chronic pain syndrome | G89.4 |
| Cognitive Impairment | |  |
|  | Cognitive Impairment | G31.84 |
| Dementia | |  |
|  | Vascular dementia | F01 |
|  | Dementia in other diseases classified elsewhere | F02 |
|  | Unspecified dementia | F03 |
| Osteoporosis | |  |
|  | Osteoporosis with current pathological fracture | M80 |
|  | Osteoporosis without current pathological fracture | M81 |
| Fractures | | S*2 |
|  | Fracture of skull and facial bones | S02 |
|  | Fracture of cervical vertebra and other parts of neck | S12 |
|  | Fracture of rib(s), sternum and thoracic spine | S22 |
|  | Fracture of lumbar spine and pelvis | S32 |
|  | Fracture of shoulder and upper arm | S42 |
|  | Fracture of forearm | S52 |
|  | Fracture at wrist and hand level | S62 |
|  | Fracture of femur | S72 |
|  | Fracture of lower leg, including ankle | S82 |
|  | Fracture of foot and toe, except ankle | S92 |
| Lung Cancer | |  |
|  | Lung Cancer | C34 |
| Any Other Cancer than lung | | C00-D49 (not C34) |
|  | Malignant neoplasms of lip, oral cavity and pharynx | C00-C14 |
|  | Malignant neoplasms of digestive organs | C15-C26 |
|  | Malignant neoplasms of respiratory and intrathoracic organs | C30-C39 |
|  | Malignant neoplasms of bone and articular cartilage | C40-C41 |
|  | Melanoma and other malignant neoplasms of skin | C43-C44 |
|  | Malignant neoplasms of mesothelial and soft tissue | C45-C49 |
|  | Malignant neoplasms of breast | C50 |
|  | Malignant neoplasms of female genital organs | C51-C58 |
|  | Malignant neoplasms of male genital organs | C60-C63 |
|  | Malignant neoplasms of urinary tract | C64-C68 |
|  | Malignant neoplasms of eye, brain and other parts of central nervous system | C69-C72 |
|  | Malignant neoplasms of thyroid and other endocrine glands | C73-C75 |
|  | Malignant neuroendocrine tumors | C7A |
|  | Secondary neuroendocrine tumors | C7B |
|  | Malignant neoplasms of ill-defined, other secondary and unspecified sites | C76-C80 |
|  | Malignant neoplasms of lymphoid, hematopoietic and related tissue | C81-C96 |
|  | In situ neoplasms | D00-D09 |
|  | Benign neoplasms, except benign neuroendocrine tumors | D10-D36 |
|  | Benign neuroendocrine tumors | D3A |
|  | Neoplasms of uncertain behavior, polycythemia vera and myelodysplastic syndromes | D37-D48 |
|  | Neoplasms of unspecified behavior | D49 |
| Rhinitis | | J30, J31.0 |
|  | Vasomotor Rhinitis | J30.0 |
|  | Chronic Rhinitis NOS | J31.0 |
|  | Allergic rhinitis due to pollen | J30.1 |
|  | Other Season allergic rhinitis | J30.2 |
|  | Allergic rhinitis due to food | J30.5 |
|  | Allergic rhinitis due to animal hair and dander (cat, dog) | J30.81 |
|  | Other allergic rhinitis | J30.89 |
|  | Allergic rhinitis, unspecified | J30.9 |
| Sinusitis | |  |
|  | Sinusitis | J01, J32 |
| Nasal polyps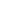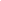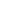 | | J33 |
|  | Polyp of nasal cavity | J33.0 |
|  | 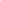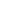Polypoid sinus degeneration | J33.1 |
|  | Other polyp of sinus | J33.8 |
|  | Nasal polyp, unspecified | J33.9 |
| Polymyalgia rheumatica | | M35.3 |
| Kidney Disease | | N17, N18, N19 |
|  | Acute kidney failure | N17 |
|  | Chronic kidney disease | N18 |
|  | Unspecified kidney failure | N19 |
| Rheumatoid Arthritis | | M05-M06 |
|  | Rheumatoid arthritis with rheumatoid factor | M05 |
|  | Other rheumatoid arthritis | M06 |
| Respiratory diseases | | J00-J99 |
|  | Pneumonia | J12-J18 |
|  | Respiratory tract infections | J00-J06 |
|  | Influenza | J09-J11 |
|  | Acute bronchitis | J20 |
|  | Bronchiectasis | J47 |
| Cystic Fibrosis | |  |
|  | Cystic fibrosis | E84 |
| GERD: Gastro-Esophageal Reflux Disease, ICD-10: 10th revision of International Classification of Diseases | | |

Table 3: Medications against comorbidities

The following medications against comorbidities were considered in this study

| **Group** |  | **ATC code** |
| --- | --- | --- |
| **Cardiovascular Medication** | | C |
|  | Cardiac Therapy | C01 |
|  | Antihyperthensives | C02 |
|  | Diuretics | C03 |
|  | Peripheral Vasodilators | C04 |
|  | Vasoprotectives | C05 |
|  | Beta Blocking Agents | C07 |
|  | Combinations of Beta Blocking Agents and Calcium Channel Blockers | C07F |
| **Calcium Channel Blockers** | | C08 |
|  | Agents acting on the renin-angiotensin system | C09 |
|  | Combinations of agents acting on the renin-angiotensin system and diuretics | C09BA, C09DA |
|  | Combinations of agents acting on the renin-angiotensin system and Calcium Channel Blockers | C09BB, C09DB |
| **Lipid modifying agents** | | C10 |
|  | Statins | C10AA, C10B |
|  | HMG CoA reductase inhibitors | C10AA |
|  | Lipid modifying agents, combinations | C10B |
| **Medication against Cognitive Impairment (Alzheimer’s)** | | N06DA |
|  | [Tacrine](http://en.wikipedia.org/wiki/Tacrine) | N06DA01 |
|  | Donepezil | N06DA02 |
|  | Rivastigmine | N06DA03 |
|  | Galantamine | N06DA04 |
|  | [Donepezil and memantine](http://en.wikipedia.org/wiki/Memantine) | N06DA52 |
|  | [Donepezil, memantine and Ginkgo folium](http://en.wikipedia.org/wiki/Ginkgo_folium) | N06DA53 |
| **Proton-Pump Inhibitors** | | A02 |
| **Antidepressants** | | N06A |
| **Anxiety** | | N05B |
| **Central Pain Killers** | |  |
|  | Propionic and Acid Derivatives | M01AE |
|  | Opioids | N02A |
|  | Anilides | N02BE |
| **Sleep Medication** | | N05C |
| **Bisphosphonates** | | M05BA |
| **Nasal Corticosteroids** | | R01AD |
| **Diabetes Medication** | | A10 |

Table 4: Respiratory medications

The following respiratory medications were considered in this study.

| **Name** | **ATC code** |
| --- | --- |
| **SABA** | R03AC02, R03AC03, R03CC02, R03CC03, |
| **SAMA** | R03BB01 |
| **Combination SABA + SAMA** | R03AL02 |
| **LABA** | R03AC12, R03AC13, R03AC18, R03AC19 R03CC12 |
| **LAMA** | R03BB04, R03BB05, R03BB06, R03BB07 |
| **Combination LABA + LAMA** | R03AL03, R03AL04, R03AL05, R03AL06 |
| **ICS** | R03BA (R03BA01, R03BA02, R03BA03, R03BA05, R03BA07, R03BA08) R03BR03BA |
| **Combination ICS + LABA** | R03AK (R03AK06, R03AK07, R03AK08, R03AK10, R03AK11 |
| **Leukontrien antagonists** | R03DC |
| **Biologics** | R03DX05, R03DX08, R03DX09 |
| **Xantines** | R03DA (R03DA04, R03DA05) |
| **Roflumilast** | R03DX07 |
| **Oral steroids** | H02AB |
| **Antibiotics** | J01AA, J01CA |
| ATC: Anatomical Therapeutic Chemical, ICS: Inhaled Corticosteroids, LABA: Long-Acting Beta2 Agonists, LAMA: Long- Acting Anticholinergics, SABA: Short-Acting Beta2 Agonists, SAMA: Short-Acting Anticholinergics | |
